# Supplementary material for: Changes in Volatile Compounds in Short-Term High CO2-Treated ‘Seolhyang’ Strawberry (Fragaria × ananassa) Fruit during Cold Storage
Source: MDPI journal article supplement (doi:10.3390/molecules27196599), 2022-10-05
Supplement: s1 [file s1]

**Table S1.** Multivariate analysis of variance F-values and *p*-values for the volatile contents of all strawberry samples.

[illegible]

**Table S1. (Continued)**

[illegible]

**Table S1.** (Continued)

| Compound code                     | 4     | 5     | 10    | 23   | 30     | 25    | 29     | 24    | Sum of volatile content |
|-----------------------------------|-------|-------|-------|------|--------|-------|--------|-------|-------------------------|
| <i>F-value</i>                    |       |       |       |      |        |       |        |       |                         |
| maturity                          | 223.7 | 485.6 | 955.1 | 84.0 | 1420.7 | 305.7 | 3081.3 | 874.7 | 0.6                     |
| CO <sub>2</sub>                   | 852.1 | 583.4 | 191.9 | 15.4 | 47.1   | 20.0  | 243.5  | 198.2 | 2069.7                  |
| time                              | 67.5  | 38.5  | 164.5 | 55.4 | 59.4   | 89.1  | 2068.8 | 944.8 | 706.5                   |
| maturity * CO <sub>2</sub>        | 24.6  | 44.9  | 7.7   | 68.0 | 10.6   | 6.6   | 43.2   | 15.3  | 175.8                   |
| maturity * time                   | 7.9   | 33.1  | 87.3  | 21.0 | 29.0   | 90.9  | 370.5  | 65.7  | 39.0                    |
| CO <sub>2</sub> * time            | 104.5 | 11.9  | 14.9  | 23.7 | 2.9    | 4.1   | 150.4  | 64.6  | 91.3                    |
| maturity * CO <sub>2</sub> * time | 10.3  | 19.4  | 9.8   | 6.5  | 5.2    | 10.2  | 7.3    | 6.6   | 21.5                    |
| <i>p-value</i>                    |       |       |       |      |        |       |        |       |                         |
| maturity                          | ***   | ***   | ***   | ***  | ***    | ***   | ***    | ***   | NS                      |
| CO <sub>2</sub>                   | ***   | ***   | ***   | ***  | ***    | ***   | ***    | ***   | ***                     |
| time                              | ***   | ***   | ***   | ***  | ***    | ***   | ***    | ***   | ***                     |
| maturity * CO <sub>2</sub>        | ***   | ***   | **    | ***  | **     | *     | ***    | ***   | ***                     |
| maturity * time                   | ***   | ***   | ***   | ***  | ***    | ***   | ***    | ***   | ***                     |
| CO <sub>2</sub> * time            | ***   | ***   | ***   | ***  | *      | **    | ***    | ***   | ***                     |
| maturity * CO <sub>2</sub> * time | ***   | ***   | ***   | **   | **     | ***   | ***    | ***   | ***                     |

Number corresponded with peak no. in Table 1

NS stands for not significant ( $p > 0.05$ ).

\*, \*\*, and \*\*\* indicate significantly different at  $p < 0.05$ ,  $p < 0.01$ , and  $p < 0.001$ , respectively.
